# Supplementary material for: Serum metabolites and risk of myocardial infarction and ischemic stroke: a targeted metabolomic approach in two German prospective cohorts
Source: Springer Nature journal article supplement (doi:10.1007/s10654-017-0333-0), 2017-11-27

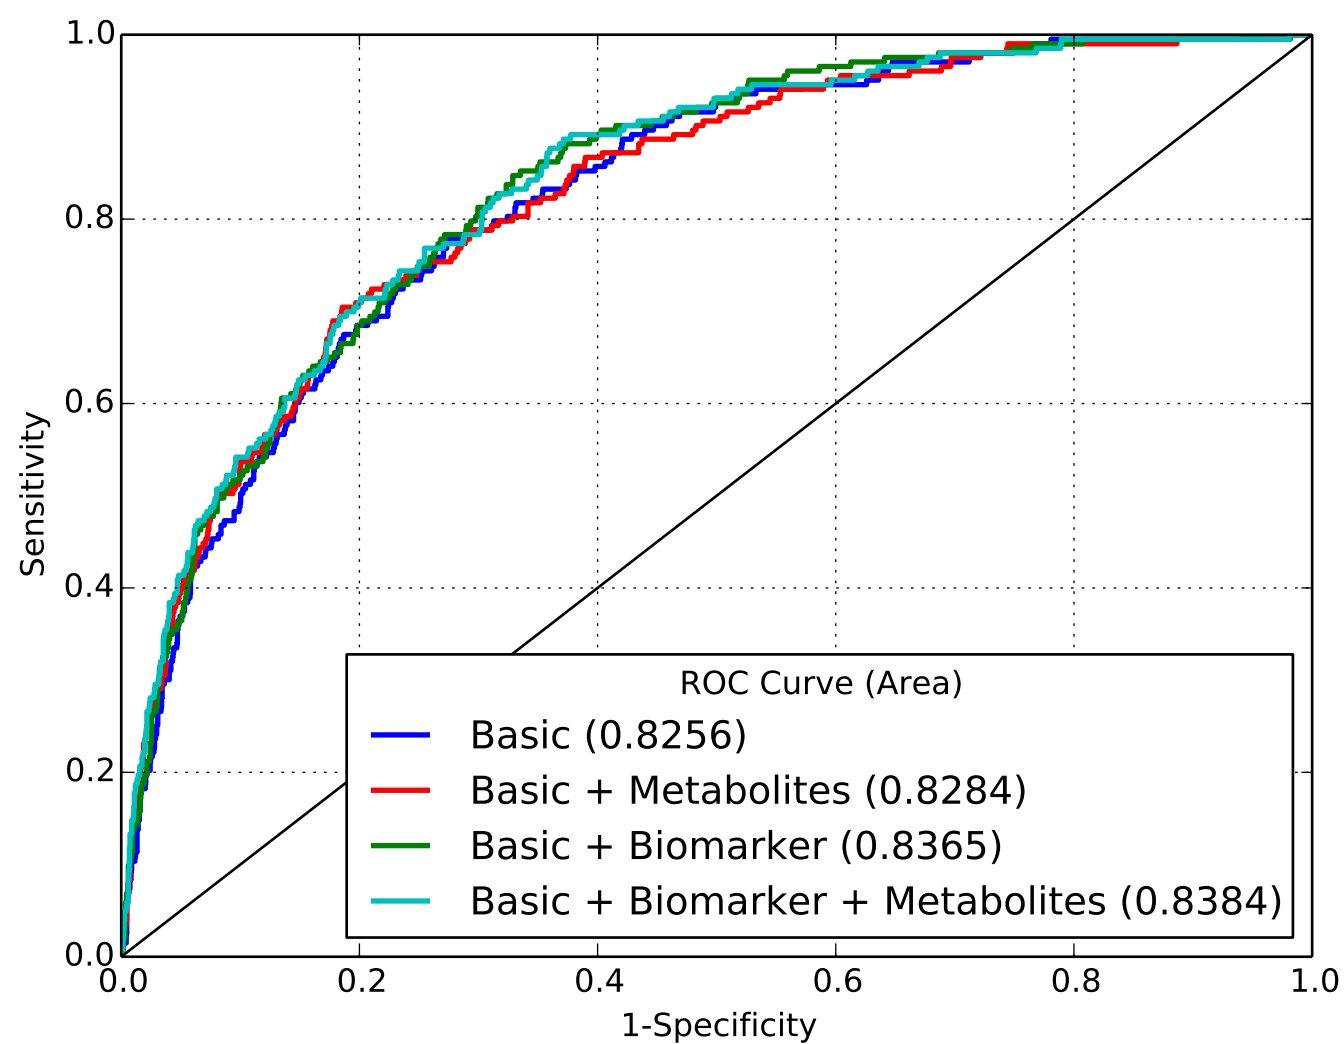

Supplement: MOESM2 [file 15257606]
